# Supplementary material for: Greater Mitochondrial DNA Pathogenicity is Associated with Greater Regional Cerebral Blood Flow in Youth Bipolar Disorder
Source: Research Square preprint supplement (doi:10.21203/rs.3.rs-7635750/v1), 2025-10-20
Supplement: Supplementary file 1 [file 3226897b7b1c640a1b013819.docx]

| **Supplementary Table 1.** Demographic Characteristics. | | | | | |
| --- | --- | --- | --- | --- | --- |
|  | BD  (n=56) | CG  (n=45) | ta /χ2b/Hc | *p*-Value | Effect  size |
| Age | 17.3 ± 1.5 | 16.9 ± 1.9 | 1.24a | 0.22 | 0.25d |
| Sex (n, % Female) | 39 (70) | 20 (44) | 6.52b | **0.011** | 0.25v |
| Race (n, % Caucasian) | 50 (89) | 34 (76) | 7.94b | 0.34 | 0.28v |
| BMI (adjusted) | 23.3 ± 4.7 | 22.5 ± 3.6 | 1.20a | 0.23 | 0.24d |
| Tanner Stage |  |  | 6.04c | **0.014** | 0.05η2 |
| (n, % stage 3) | 4 (7) | 5 (11) |  |  |  |
| (n, % stage 4) | 21 (38) | 26 (58) |  |  |  |
| (n, % stage 5) | 31 (55) | 13 (29) |  |  |  |
| Note: Results are reported as mean ± standard deviation (SD) or percentage (%) unless otherwise specified. BD = Bipolar disorder  a = t-test, b = Chi-square Test, c =Kruskal-Wallis Test  Effect size was reported in as Cohen’s d=*d* for t-test, Cramer’s V=*V* for Crosstab, and eta-squared = η2 for Kruskal-Walllis test  Missing cases (n): Tanner Stage (1) | | | | | |

**Supplementary Table 2.** Clinical Characteristics

|  | **BD (n=56)** |
| --- | --- |
| BD-I | 19 (34%) |
| BD-II | 16 (29%) |
| BD-NOS | 21 (38%) |
| Age of BD onset (years) | 14.6 ± 2.7 |
| **Lifetime Clinical Characteristics** |  |
| Psychosis | 15 (27%) |
| Suicide attempts | 7 (13%) |
| Self-injurious behaviour | 32 (57%) |
| Physical/ sexual abuse | 5 (9%) |
| Psychiatric hospitalization | 26 (46%) |
| **Lifetime Comorbid Diagnoses** |  |
| ADHD | 25 (45%) |
| Anxiety disorder | 45 (80%) |
| Number of anxiety disorders | 2.0 ± 1.5 |
| Conduct disorder | 2 (4%) |
| Oppositional defiant disorder | 15 (27%) |
| Substance use disorder | 3 (5%) |
| Nicotine use | 25 (45%) |
| **Current Medications** |  |
| Second generation antipsychotics | 34 (61%) |
| Lithium | 14 (25%) |
| Non-SSRI antidepressants | 4 (7%) |
| SSRI antidepressants | 6 (11%) |
| Stimulants | 5 (9%) |
| Any medication | 47 (84%) |
| **Family Psychiatric History** |  |
| Mania/hypomania | 33 (59%) |
| Depression | 43 (77%) |
| Anxiety | 39 (70%) |
| ADHD | 25 (45%) |
| Psychosis | 10 (17.9%) |
| Substance use disorder | 13 (23.2%) |
| Suicide attempt | 22 (39.3%) |
| BD = Bipolar disorder; NOS = Not otherwise specified; ADHD = Attention deficit-hyperactivity disorder; SSRI = Selective serotonin reuptake inhibitor. Note: Results are reported in mean ± standard deviation (SD) or percentage (%) unless otherwise specified.  Missing cases (n): Lifetime Psychosis (1); Lifetime Physical/ sexual abuse (12); Lifetime Substance use disorder (20); Family Psychiatric History Depression (1); Family Psychiatric History Mania/hypomania (1); Family Psychiatric History ADHD (1); Family Psychiatric History Anxiety (1); Family Psychiatric History Psychosis (1); Family Psychiatric History Suicide attempt (1); | |

**Supplementary Table 3.** mtDNA variant FI score

| **Variant** | **MutPred Score** | **mtDNA Selection Score** | **MitoTool Score** | **FI Score** | **Frequency (n, %)** |
| --- | --- | --- | --- | --- | --- |
| **m.4216** | 0.61 | 0.73 | 0.71 | 2.05 | 20 (20) |
| **m.4917** | 0.63 | 0.78 | 0.92 | 2.33 | 10 (10) |
| **m.14798** | 0.61 | 0.72 | 0.54 | 1.87 | 13 (12) |
| **m.4216 & m.4917** | 1.24 | 1.51 | 1.63 | 4.38 | 10 (10) |
| **m.4216 & m.14798** | 1.22 | 1.45 | 1.25 | 3.92 | 5 (5) |

FI: functional impact score of mtDNA variant; m.4216m.4216T>C variant in the MT-ND1 gene; m.4917: m.4917A>G variant in the MT-ND2 gene; m.14798: m.14798T>C variant in the MT-CYB gene.

**Supplementary Table 4.** FI score of mt-DNA variants and heteroplasmy characteristics

| **Variable** | **Control Group (n=45)** | | **BD (n=56)** | | **Statistic** | **p** |
| --- | --- | --- | --- | --- | --- | --- |
| **FI, mean ± SD** |  |  |  |  |  |  |
| m.4216 | 0.27 ± 0.70 | | 0.51 ± 0.90 | | F=2.02 | 0.16 |
| m.4917 | 0.05 ± 0.35 | | 0.37 ± 0.86 | | F=3.98 | **0.049*** |
| m.14798 | 0.25 ± 0.64 | | 0.20 ± 0.58 | | F=0.28 | 0.60 |
| m.4216 & m.4917 | 0.10 ± 0.65 | | 0.70 ± 1.62 | | F=3.98 | **0.049*** |
| m.4216 & m.14798 | 0.26 ± 0.99 | | 0.14 ± 0.73 | | F=0.64 | 0.43 |
| **Heteroplasmy, mean ± SD** |  | |  | |  | |
| Global level | 0.04 ± 0.13 | | 0.06 ± 0.14 | | 0.59 | 0.55 |
| Count | 0.44 ± 0.62 | | 0.55 ± 0.74 | | 0.79 | 0.43 |

BD: Bipolar disorder; FI: functional impact score of mtDNA variant; m.4216: m.4216T>C variant in the MT-ND1 gene; m.4917: m.4917A>G variant in the MT-ND2 gene; m.14798: m.14798T>C variant in the MT-CYB gene. p-values under 0.05 were considered statistically significant. * p<0.05, **p<0.01.

**Supplementary table 5.** Haplogroup Distribution of 101 Individuals.

| **Macro-haplogroups, number (%)** | **Overall sample**  **(N=101)** | **BD**  **(n=56)** | **CG**  **(n=45)** |
| --- | --- | --- | --- |
| **H-HV-V** | 47 (47 %) | 23 (41%) | 24 (53%) |
| **J-T** | 20 (20%) | 14 (25%) | 6 (13%) |
| **U-K** | 28 (27%) | 16 (29%) | 12 (27%) |
| **others** | 6 (6%) | 3 (5%) | 3 (7%) |
| BD: Bipolar disorder; H-HV-V: macro-haplogroup of H, HV and V; J-T: macro-haplogroup of J and T; UK: macro-haplogroup of U and K; Others: macro-haplogroup containing other European haplogroups (I, R, W and X). | | | |

**Supplementary Table 6.** SNPs Distribution across Haplogroups.

|  | **Number of individuals harboring the variant** | | |
| --- | --- | --- | --- |
| **Haplogroup** | **m.4216** | **m.4917** | **m.14798** |
| **H** | 0 | 0 | 0 |
| **V** | 0 | 0 | 0 |
| **HV** | 0 | 0 | 0 |
| **J** | 10 | 1 | 5 |
| **T** | 10 | 10 | 0 |
| **U** | 0 | 0 | 0 |
| **K** | 0 | 0 | 7 |
| m.4216: m.4216T>C variant in the MT-ND1 gene; m.4917: m.4917A>G variant in the MT-ND2 gene; m.14798: m.14798T>C variant in the MT-CYB gene. | | | |

| **Supplementary Table 7.** Association of mtDNA Heteroplasmy Global Level and Heteroplasmy Count Main Effect with CBF in ROIs. | | | | | | |
| --- | --- | --- | --- | --- | --- | --- |
| **Association of mtDNA Heteroplasmy Global Level Main Effect with CBF in ROIs** | | | | | | |
|  | **Whole Brain Gray Matter CBF** | | | **ACC Gray Matter CBF** | | |
| **Diagnosis** | **β** | **95%CI** | ***p*** | **β** | **95%CI** | ***p*** |
| **BD** | -0.08 | (-0.37, 0.21) | 0.59 | -0.18 | (-0.46, 0.10) | 0.21 |
| **CG** | -0.15 | (-0.42, 0.13) | 0.27 | -0.17 | (-0.47, 0.14) | 0.27 |
| **Overall Sample** | -0.15 | (-0.34, 0.05) | 0.14 | -0.19 | (-0.39, -0.00) | 0.05 |
| **Association of mtDNA Heteroplasmy Count Main Effect with CBF in ROIs** | | | | | | |
|  | **Whole Brain Gray Matter CBF** | | | **ACC Gray Matter CBF** | | |
| **Diagnosis** | **β** | **95%CI** | ***p*** | **β** | **95%CI** | ***p*** |
| **BD** | 0.20 | (-0.06, 0.46) | 0.13 | 0.16 | (-0.09, 0.42) | 0.20 |
| **CG** | 0.12 | (-0.18, 0.42) | 0.44 | 0.07 | (-0.26, 0.40) | 0.67 |
| **Overall Sample** | 0.16 | (-0.03, 0.36) | 0.10 | 0.12 | (-0.07, 0.32) | 0.22 |
| ACC=Anterior cingulate cortex; BD=Bipolar disorder; Significant group effects are bolded. | | | | | | |

**Supplementary Table 8.** Association of mtDNA Haplogroups Main Effect with CBF in ROIs.

|  | | **Whole Brain Gray Matter CBF** | | | **ACC Gray Matter CBF** | | |
| --- | --- | --- | --- | --- | --- | --- | --- |
| **Haplogroups** | | **BD** | **CG** | **Overall Sample** | **BD** | **CG** | **Overall Sample** |
| **H** | **dfbetween** | 1 | 1 | 1 | 1 | 1 | 1 |
| **dfwithin** | 52 | 41 | 96 | 52 | 41 | 96 |
| **F** | 1.90 | 1.14 | 3.09 | 4.59 | 1.16 | 5.03 |
| ***p*** | 0.17 | 0.29 | 0.08 | 0.04 | 0.29 | 0.03 |
| **V** | **dfbetween** | 1 | 1 | 1 | 1 | 1 | 1 |
| **dfwithin** | 52 | 41 | 96 | 52 | 41 | 96 |
| **F** | 0.26 | 0.18 | 0.02 | 0.04 | 0.58 | 0.41 |
| ***p*** | 0.61 | 0.67 | 0.89 | 0.84 | 0.45 | 0.53 |
| **HV** | **dfbetween** | 1 | 1 | 1 | 1 | 1 | 1 |
| **dfwithin** | 52 | 41 | 96 | 52 | 41 | 96 |
| **F** | 1.92 | 0.28 | 0.00 | 0.22 | 1.70 | 0.11 |
| ***p*** | 0.17 | 0.61 | 0.99 | 0.64 | 0.20 | 0.74 |
| **J** | **dfbetween** | 1 | 1 | 1 | 1 | 1 | 1 |
| **dfwithin** | 52 | 41 | 96 | 52 | 41 | 96 |
| **F** | 2.29 | 0.00 | 1.10 | 2.67 | 0.06 | 1.42 |
| ***p*** | 0.14 | 0.96 | 0.30 | 0.11 | 0.81 | 0.24 |
| **T** | **dfbetween** | 1 | 1 | 1 | 1 | 1 | 1 |
| **dfwithin** | 52 | 41 | 96 | 52 | 41 | 96 |
| **F** | 0.53 | 0.90 | 1.00 | 1.49 | 0.51 | 2.09 |
| ***p*** | 0.47 | 0.35 | 0.32 | 0.23 | 0.48 | 0.15 |
| **U** | **dfbetween** | 1 | 1 | 1 | 1 | 1 | 1 |
| **dfwithin** | 52 | 41 | 96 | 52 | 41 | 96 |
| **F** | 0.33 | 0.31 | 0.06 | 0.00 | 0.17 | 0.03 |
| ***p*** | 0.57 | 0.58 | 0.80 | 0.95 | 0.69 | 0.87 |
| **K** | **dfbetween** | 1 | 1 | 1 | 1 | 1 | 1 |
| **dfwithin** | 52 | 41 | 96 | 52 | 41 | 96 |
| **F** | 0.62 | 0.09 | 0.28 | 0.27 | 0.00 | 0.28 |
| ***p*** | 0.44 | 0.77 | 0.60 | 0.61 | 0.98 | 0.60 |
| ACC= Anterior cingulate cortex; BD= Bipolar disorder; Significant group effects are bolded. | | | | | | | |
